# Supplementary material
Source: MDPI journal article supplement (https://www.mdpi.com/2077-1312/11/2/413)
Supplement: s1 [file s1]

**Table S1.** Fuel elements and characteristics statistical results.

| Ingredient            | Unit               | Valve       | Standard                         |
|-----------------------|--------------------|-------------|----------------------------------|
| Carbon                | %, m/m             | 85.15~86.99 | GB/T 476-2008; NB/SH/T 0656-2017 |
| Hydrogen              | %, m/m             | 12.61~14.62 | GB/T 476-2008; NB/SH/T 0656-2017 |
| Oxygen                | %, m/m             | 0.06~0.81   | Differential subtraction         |
| Nitrogen              | %, m/m             | 0.00~0.04   | GB/T 19227-2008; SH/T 0657-2007  |
| Sulfur                | %, m/m             | 0.00~0.09   | ISO 8754-2003; SH/T 0689-2000    |
| Gross calorific value | MJ/kg              | 44.49~46.30 | ASTM D240-2019; GB/T 384-1981    |
| Net calorific value   | MJ/kg              | 42.01~43.12 | ASTM D240-2019; GB/T 384-1981    |
| Viscosity(20°C)       | mm <sup>2</sup> /s | 3.85~5.05   | ISO 3104-1994; GB/T 265-1988     |
| Density(20°C)         | kg/m <sup>3</sup>  | 820.7~845.0 | GB/T1885-1998; GB/T 1884-2000    |
| Water content         | %, m/m             | 0.00~0.05   | ISO 3733-1999; GB/T 260-2016     |

**Table S2.** Fuel-based emission factors-CHINA I emission standard.

(kg/t-fuel)

| Cycle | SV <sup>1</sup><br>(L) | SP <sup>2</sup><br>(kW) | n <sup>3</sup> | EF <sup>f</sup> <sub>NOx</sub><br>x±s <sup>4</sup> | EF <sup>f</sup> <sub>CO</sub><br>x±s | EF <sup>f</sup> <sub>CO2</sub><br>x±s | EF <sup>f</sup> <sub>HC</sub><br>x±s | EF <sup>f</sup> <sub>NOx+HC</sub><br>x±s |
|-------|------------------------|-------------------------|----------------|----------------------------------------------------|--------------------------------------|---------------------------------------|--------------------------------------|------------------------------------------|
| E3    | A                      | -                       | -              | -                                                  | -                                    | -                                     | -                                    | -                                        |
|       | B                      | 14~28                   | 4              | 24.73±3.26                                         | 2.47±1.19                            | 3087±13                               | 1.07±0.37                            | 25.80±3.25                               |
|       | C                      | 33~100                  | 14             | 29.84±2.53                                         | 3.04±1.22                            | 3130±52                               | 1.26±0.80                            | 31.10±2.31                               |
|       | D                      | 73~245                  | 12             | 32.95±3.47                                         | 4.67±1.59                            | 3078±32                               | 2.49±1.44                            | 35.44±3.77                               |
|       | E                      | 245                     | 1              | 39.14                                              | 4.28                                 | 3077                                  | 2.43                                 | 41.57                                    |
|       | F                      | 340~365                 | 2              | 42.22±4.81                                         | 5.14±2.01                            | 3083±10                               | 2.65±0.25                            | 44.87±4.56                               |
|       | G                      | 400                     | 1              | 34.93                                              | 5.76                                 | 3121                                  | 1.45                                 | 36.38                                    |
| E2    | A                      | -                       | -              | -                                                  | -                                    | -                                     | -                                    | -                                        |
|       | B                      | -                       | -              | -                                                  | -                                    | -                                     | -                                    | -                                        |
|       | C                      | 92                      | 1              | 28.33                                              | 3.65                                 | 3079                                  | 0.97                                 | 29.30                                    |
|       | D                      | 100~245                 | 9              | 28.10±2.62                                         | 3.84±1.78                            | 3080±29                               | 3.18±1.97                            | 31.28±3.14                               |
|       | E                      | 221~294                 | 3              | 29.03±4.09                                         | 3.16±1.17                            | 3086±41                               | 2.65±1.36                            | 31.68±4.35                               |
|       | F                      | 330~365                 | 2              | 37.41±1.56                                         | 3.91±1.58                            | 3083±11                               | 3.06±0.39                            | 40.47±1.17                               |
|       | G                      | 400                     | 1              | 31.41                                              | 7.78                                 | 3116                                  | 1.99                                 | 33.40                                    |
| D2    | A                      | -                       | -              | -                                                  | -                                    | -                                     | -                                    | -                                        |
|       | B                      | 14~40                   | 4              | 24.98±4.38                                         | 5.20±4.55                            | 3081±44                               | 2.36±1.70                            | 27.34±3.18                               |
|       | C                      | 48~100                  | 8              | 26.35±2.44                                         | 4.32±1.10                            | 3102±39                               | 1.62±1.01                            | 27.96±1.59                               |
|       | D                      | 100~245                 | 10             | 26.99±3.66                                         | 5.25±2.13                            | 3056±33                               | 4.14±3.13                            | 31.13±3.06                               |
|       | E                      | 202~268                 | 2              | 33.10±1.09                                         | 5.62±1.13                            | 3058±37                               | 2.65±1.61                            | 35.75±2.71                               |
|       | F                      | 300                     | 1              | 38.41                                              | 4.05                                 | 3079                                  | 3.66                                 | 42.07                                    |
|       | G                      | 375                     | 1              | 29.42                                              | 13.22                                | 3103                                  | 2.60                                 | 32.02                                    |

<sup>1</sup> SV represents the single cylinder displacement; <sup>2</sup> SP represents the single cylinder power;<sup>3</sup> n represents the number of samples. <sup>4</sup> x represents the mean, and s represents the standard deviation;**Table S3.** Fuel-based emission factors-CHINA II emission standard.

(kg/t-fuel)

| Cycle | SV <sup>1</sup><br>(L) | SP <sup>2</sup><br>(kW) | n <sup>3</sup> | EF <sup>f</sup> <sub>NOx</sub><br>x±s <sup>4</sup> | EF <sup>f</sup> <sub>CO</sub><br>x±s | EF <sup>f</sup> <sub>CO2</sub><br>x±s | EF <sup>f</sup> <sub>HC</sub><br>x±s | EF <sup>f</sup> <sub>NOx+HC</sub><br>x±s |
|-------|------------------------|-------------------------|----------------|----------------------------------------------------|--------------------------------------|---------------------------------------|--------------------------------------|------------------------------------------|
| E3    | A                      | 19~30                   | 2              | 21.13±1.30                                         | 1.64±0.36                            | 3048±18                               | 0.45±0.12                            | 21.58±1.41                               |
|       | B                      | -                       | -              | -                                                  | -                                    | -                                     | -                                    | -                                        |
|       | C                      | 33~135                  | 7              | 20.68±2.41                                         | 2.50±0.47                            | 3117±45                               | 1.05±0.70                            | 21.73±2.41                               |
|       | D                      | 73~221                  | 8              | 25.55±5.58                                         | 3.88±2.12                            | 3096±47                               | 1.10±0.58                            | 26.64±5.92                               |
|       | E                      | 221~335                 | 5              | 32.40±3.77                                         | 4.90±1.49                            | 3087±52                               | 2.51±0.80                            | 34.91±3.92                               |
|       | F                      | 365                     | 1              | 44.03                                              | 3.36                                 | 3087                                  | 2.32                                 | 46.35                                    |
|       | G                      | 400~450                 | 4              | 39.55±3.72                                         | 5.46±1.47                            | 3104±42                               | 1.17±0.39                            | 40.72±3.47                               |

|    |   |         |   |            |           |         |           |            |   |
|----|---|---------|---|------------|-----------|---------|-----------|------------|---|
| E2 | A | -       | - | -          | -         | -       | -         | -          | - |
|    | B | -       | - | -          | -         | -       | -         | -          | - |
|    | C | 135     | 1 | 22.50      | 1.85      | 3088    | 0.89      | 23.39      |   |
|    | D | 73~213  | 5 | 24.10±0.90 | 3.70±1.82 | 3093±47 | 1.15±1.01 | 25.25±1.41 |   |
|    | E | 239~325 | 4 | 28.95±3.65 | 3.38±0.61 | 3076±51 | 3.15±0.81 | 32.10±3.63 |   |
|    | F | -       | - | -          | -         | -       | -         | -          |   |
|    | G | 300~450 | 4 | 36.61±4.03 | 5.21±1.86 | 3104±41 | 1.75±0.76 | 38.36±3.48 |   |
| D2 | A | 15      | 1 | 14.99      | 3.21      | 3048    | 1.48      | 16.47      |   |
|    | B | -       | - | -          | -         | -       | -         | -          |   |
|    | C | 58~135  | 4 | 22.21±1.55 | 4.87±2.34 | 3087±19 | 1.89±1.42 | 24.10±1.39 |   |
|    | D | 73~213  | 6 | 22.13±2.35 | 5.62±2.95 | 3080±63 | 2.13±1.32 | 24.26±2.21 |   |
|    | E | 202~325 | 5 | 27.54±3.43 | 4.70±0.78 | 3043±11 | 3.82±1.10 | 31.36±2.86 |   |
|    | F | -       | - | -          | -         | -       | -         | -          |   |
|    | G | 394     | 2 | 39.55±4.71 | 4.88±1.02 | 3059±3  | 2.00±1.20 | 41.55±3.51 |   |

<sup>1</sup> SV represents the single cylinder displacement; <sup>2</sup> SP represents the single cylinder power;

<sup>3</sup> n represents the number of samples. <sup>4</sup> x represents the mean, and s represents the standard deviation;

**Table S4.** Energy-based emission factors-CHINA I emission standard.

(g/kW•h)

| Cycle | SV <sup>1</sup><br>(L) | SP <sup>2</sup><br>(kW) | n <sup>3</sup> | EF <sup>e</sup> NO <sub>x</sub> | EF <sup>e</sup> HC | EF <sup>e</sup> CO <sub>2</sub> | EF <sup>e</sup> NO <sub>x</sub> +HC |                            | EF <sup>e</sup> PM |               | EF <sup>e</sup> CO |               |
|-------|------------------------|-------------------------|----------------|---------------------------------|--------------------|---------------------------------|-------------------------------------|----------------------------|--------------------|---------------|--------------------|---------------|
|       |                        |                         |                | x±s <sup>4</sup>                | x±s                | x±s                             | x±s                                 | margin <sup>5</sup><br>(%) | x±s                | margin<br>(%) | x±s                | margin<br>(%) |
| E3    | A                      | -                       | -              | -                               | -                  | -                               | -                                   | -                          | -                  | -             | -                  | -             |
|       | B                      | 14~28                   | 4              | 5.50±0.51                       | 0.20±0.07          | 683±34                          | 5.70±0.49                           | 21                         | 0.10±0.08          | 67            | 0.49±0.24          | 90            |
|       | C                      | 33~10                   | 14             | 5.91±0.48                       | 0.25±0.16          | 642±20                          | 6.16±0.42                           | 14                         | 0.08±0.03          | 60            | 0.56±0.23          | 89            |
|       | D                      | 73~24                   | 12             | 6.48±0.61                       | 0.49±0.26          | 635±23                          | 6.97±0.67                           | 11                         | 0.16±0.05          | 41            | 0.93±0.33          | 81            |
|       | E                      | 245                     | 1              | 8.04                            | 0.50               | 645                             | 8.54                                | 2                          | 0.18               | 64            | 0.62               | 88            |
|       | F                      | 340~3                   | 2              | 8.22±0.78                       | 0.53±0.07          | 620±10                          | 8.75±0.71                           | 11                         | 0.13±0.01          | 74            | 0.95±0.39          | 81            |
|       | G                      | 400                     | 1              | 6.99                            | 0.29               | 627                             | 7.28                                | 34                         | 0.10               | 80            | 0.93               | 81            |
| E2    | A                      | -                       | -              | -                               | -                  | -                               | -                                   | -                          | -                  | -             | -                  | -             |
|       | B                      | -                       | -              | -                               | -                  | -                               | -                                   | -                          | -                  | -             | -                  | -             |
|       | C                      | 92                      | 1              | 5.96                            | 0.20               | 645                             | 6.16                                | 14                         | 0.09               | 55            | 0.70               | 86            |
|       | D                      | 100~2                   | 9              | 6.03±0.52                       | 0.61±0.34          | 654±22                          | 6.63±0.54                           | 15                         | 0.15±0.05          | 44            | 0.77±0.32          | 85            |
|       | E                      | 221~2                   | 3              | 6.38±1.10                       | 0.53±0.28          | 657±34                          | 6.91±1.19                           | 21                         | 0.19±0.05          | 62            | 0.59±0.23          | 88            |
|       | F                      | 330~3                   | 2              | 7.71±0.34                       | 0.57±0.07          | 629±5                           | 8.28±0.26                           | 16                         | 0.13±0.01          | 74            | 0.79±0.39          | 84            |
|       | G                      | 400                     | 1              | 6.63                            | 0.37               | 638                             | 7.00                                | 36                         | 0.18               | 64            | 1.19               | 76            |
| D2    | A                      | -                       | -              | -                               | -                  | -                               | -                                   | -                          | -                  | -             | -                  | -             |
|       | B                      | 14~40                   | 4              | 5.56±0.56                       | 0.35±0.23          | 672±59                          | 5.92±0.51                           | 18                         | 0.05±0.02          | 83            | 0.86±0.80          | 83            |
|       | C                      | 48~10                   | 8              | 5.75±0.53                       | 0.34±0.23          | 678±46                          | 6.09±0.41                           | 15                         | 0.12±0.04          | 40            | 0.87±0.52          | 83            |
|       | D                      | 100~2                   | 10             | 6.13±0.74                       | 0.76±0.53          | 679±19                          | 6.89±0.54                           | 12                         | 0.20±0.02          | 26            | 0.97±0.39          | 81            |
|       | E                      | 202~2                   | 2              | 7.52±0.31                       | 0.51±0.30          | 658±12                          | 8.03±0.61                           | 8                          | 0.36±0.08          | 28            | 0.94±0.20          | 81            |
|       | F                      | 300                     | 1              | 8.53                            | 0.71               | 659                             | 9.24                                | 6                          | 0.26               | 48            | 0.75               | 85            |
|       | G                      | 375                     | 1              | 6.56                            | 0.43               | 660                             | 6.99                                | 36                         | 0.34               | 32            | 2.30               | 54            |

<sup>1</sup> SV represents the single cylinder displacement; <sup>2</sup> SP represents the single cylinder power; <sup>3</sup> n represents the number of samples; <sup>4</sup> x represents the mean, and s represents the standard deviation; <sup>5</sup> margin=(Avg.-Limit)/Limit×100%, limit value seen in Table 2.

**Table S5.** Energy-based emission factors-CHINA II emission standard.

(g/kW•h)

| Cycle | SV <sup>1</sup><br>(L) | SP <sup>2</sup><br>(kW) | n <sup>3</sup> | EF <sup>e</sup> NO <sub>x</sub> | EF <sup>e</sup> HC | EF <sup>e</sup> CO <sub>2</sub> | EF <sup>e</sup> NO <sub>x</sub> +HC |                            | EF <sup>e</sup> PM |               | EF <sup>e</sup> CO |               |
|-------|------------------------|-------------------------|----------------|---------------------------------|--------------------|---------------------------------|-------------------------------------|----------------------------|--------------------|---------------|--------------------|---------------|
|       |                        |                         |                | x±s <sup>4</sup>                | x±s                | x±s                             | x±s                                 | margin <sup>5</sup><br>(%) | x±s                | margin<br>(%) | x±s                | margin<br>(%) |
| E3    | A                      | 19~30                   | 2              | 4.67±0.07                       | 0.09±0.02          | 680±28                          | 4.76±0.08                           | 18                         | 0.05±0.03          | 83            | 0.37±0.12          | 93            |
|       | B                      | -                       | -              | -                               | -                  | -                               | -                                   | -                          | -                  | -             | -                  | -             |
|       | C                      | 33~135                  | 7              | 4.55±0.69                       | 0.21±0.14          | 699±43                          | 4.76±0.65                           | 18                         | 0.06±0.02          | 50            | 0.53±0.16          | 89            |
|       | D                      | 73~221                  | 8              | 5.52±0.69                       | 0.23±0.12          | 692±35                          | 5.75±0.75                           | -                          | 0.09±0.02          | -             | 0.72±0.45          | 86            |

|    |   |         |   |           |           |        |           |    |           |    |           |    |
|----|---|---------|---|-----------|-----------|--------|-----------|----|-----------|----|-----------|----|
| E2 | E | 221~335 | 5 | 6.53±0.74 | 0.50±0.16 | 633±29 | 7.03±0.80 | -  | 0.16±0.07 | -  | 0.72±0.24 | 86 |
|    | F | 365     | 1 | 8.61      | 0.46      | 630    | 9.07      | 7  | 0.07      | 86 | 0.65      | 87 |
|    | G | 400~450 | 4 | 7.54±0.47 | 0.21±0.08 | 612±13 | 7.76±0.45 | 30 | 0.08±0.01 | 84 | 0.96±0.25 | 81 |
|    | A | -       | - | -         | -         | -      | -         | -  | -         | -  | -         | -  |
|    | B | -       | - | -         | -         | -      | -         | -  | -         | -  | -         | -  |
|    | C | 135     | 1 | 4.83      | 0.17      | 685    | 5.00      | 14 | 0.07      | 42 | 0.36      | 93 |
|    | D | 73~213  | 5 | 5.44±0.21 | 0.23±0.20 | 690±11 | 5.67±0.29 | -  | 0.10±0.01 | -  | 0.75±0.39 | 85 |
|    | E | 239~325 | 4 | 6.25±0.78 | 0.63±0.16 | 656±6  | 6.88±0.80 | -  | 0.20±0.09 | -  | 0.64±0.13 | 87 |
|    | F | -       | - | -         | -         | -      | -         | -  | -         | -  | -         | -  |
|    | G | 300~450 | 4 | 7.40±0.60 | 0.29±0.13 | 624±16 | 7.69±0.55 | 30 | 0.11±0.01 | 78 | 0.95±0.28 | 81 |
| D2 | A | 15      | 1 | 3.48      | 0.22      | 682    | 3.70      | 36 | 0.08      | 73 | 0.55      | 89 |
|    | B | -       | - | -         | -         | -      | -         | -  | -         | -  | -         | -  |
|    | C | 58~135  | 4 | 4.90±0.16 | 0.30±0.20 | 692±20 | 5.20±0.14 | 10 | 0.07±0.02 | 42 | 0.74±0.34 | 85 |
|    | D | 73~213  | 6 | 5.20±0.35 | 0.36±0.24 | 718±33 | 5.56±0.33 | -  | 0.10±0.01 | 29 | 0.93±0.38 | 81 |
|    | E | 202~325 | 5 | 6.28±0.70 | 0.77±0.24 | 674±45 | 6.06±0.70 | -  | 0.25±0.10 | -  | 0.87±0.15 | 83 |
|    | F | -       | - | -         | -         | -      | -         | -  | -         | -  | -         | -  |
|    | G | 394     | 2 | 8.15±1.09 | 0.31±0.18 | 619±25 | 8.46±0.91 | 23 | 0.14±0.01 | 72 | 0.99±0.11 | 80 |

<sup>1</sup> SV represents the single cylinder displacement; <sup>2</sup> SP represents the single cylinder power; <sup>3</sup> n represents the number of samples; <sup>4</sup> x represents the mean, and s represents the standard deviation; <sup>5</sup> margin=(Avg.-Limit)/Limit×100%, limit value seen in Table 3.

**Table S6.** Carbon balance calculation method.

| No.              | Formula and Symbol                                                                                                                                                                                                                                                                                                                         | Unit |                  |                   |                  |                   |                  |                   |                  |                   |                  |
|------------------|--------------------------------------------------------------------------------------------------------------------------------------------------------------------------------------------------------------------------------------------------------------------------------------------------------------------------------------------|------|------------------|-------------------|------------------|-------------------|------------------|-------------------|------------------|-------------------|------------------|
| 1                | $q_{mew} = q_{mf} \times \left\{ \left[ \frac{\frac{\omega_{BET} \times \omega_{BET} \times 1.4}{\left( \frac{1.4 \times \omega_{BET}}{f_c} + \omega_{ALF} \times 0.08936 - 1 \right) \times \frac{1}{1.293} + f_{fd}}}{f_c \times f_c} + \omega_{ALF} \times 0.08936 \right] - 1 \times \left( 1 + \frac{H_a}{1000} \right) + 1 \right\}$ |      |                  |                   |                  |                   |                  |                   |                  |                   |                  |
|                  | q <sub>mew</sub> : Exhaust gas mass flow rate on wet basis                                                                                                                                                                                                                                                                                 | kg/h |                  |                   |                  |                   |                  |                   |                  |                   |                  |
|                  | q <sub>mf</sub> : Fuel mass flow rate                                                                                                                                                                                                                                                                                                      | kg/h |                  |                   |                  |                   |                  |                   |                  |                   |                  |
|                  | Symbols for fuel composition:                                                                                                                                                                                                                                                                                                              | %m/m |                  |                   |                  |                   |                  |                   |                  |                   |                  |
|                  | <table><tr><td>ω<sub>ALF</sub></td><td>H content of fuel</td></tr><tr><td>ω<sub>BET</sub></td><td>C content of fuel</td></tr><tr><td>ω<sub>GAM</sub></td><td>S content of fuel</td></tr><tr><td>ω<sub>DEL</sub></td><td>N content of fuel</td></tr><tr><td>ω<sub>EPS</sub></td><td>O content of fuel</td></tr></table>                     |      | ω <sub>ALF</sub> | H content of fuel | ω <sub>BET</sub> | C content of fuel | ω <sub>GAM</sub> | S content of fuel | ω <sub>DEL</sub> | N content of fuel | ω <sub>EPS</sub> |
| ω <sub>ALF</sub> | H content of fuel                                                                                                                                                                                                                                                                                                                          |      |                  |                   |                  |                   |                  |                   |                  |                   |                  |
| ω <sub>BET</sub> | C content of fuel                                                                                                                                                                                                                                                                                                                          |      |                  |                   |                  |                   |                  |                   |                  |                   |                  |
| ω <sub>GAM</sub> | S content of fuel                                                                                                                                                                                                                                                                                                                          |      |                  |                   |                  |                   |                  |                   |                  |                   |                  |
| ω <sub>DEL</sub> | N content of fuel                                                                                                                                                                                                                                                                                                                          |      |                  |                   |                  |                   |                  |                   |                  |                   |                  |
| ω <sub>EPS</sub> | O content of fuel                                                                                                                                                                                                                                                                                                                          |      |                  |                   |                  |                   |                  |                   |                  |                   |                  |
| 2                | Ha: Absolute humidity of the intake air (g water /kg dry air)                                                                                                                                                                                                                                                                              |      |                  |                   |                  |                   |                  |                   |                  |                   |                  |
|                  | $Ha = \frac{6.22 \times pa \times Ra}{ps} = \frac{6.22 \times pa \times Ra}{pb - 0.01 \times pa \times Ra}$                                                                                                                                                                                                                                | g/kg |                  |                   |                  |                   |                  |                   |                  |                   |                  |
|                  | pa: Saturation vapour pressure of the engine intake air determined using a temperature value for the intake air measured at the same physical location as the measurements for pb and Ra.                                                                                                                                                  | kPa  |                  |                   |                  |                   |                  |                   |                  |                   |                  |
|                  | Ra: Relative humidity of the intake air                                                                                                                                                                                                                                                                                                    | %    |                  |                   |                  |                   |                  |                   |                  |                   |                  |
|                  | ps: Dry atmospheric pressure calculated by the following formula:<br>$p_s = P_b - Ra \cdot P_a / 100$                                                                                                                                                                                                                                      | kPa  |                  |                   |                  |                   |                  |                   |                  |                   |                  |
|                  | pb: Total barometric pressure                                                                                                                                                                                                                                                                                                              | kPa  |                  |                   |                  |                   |                  |                   |                  |                   |                  |
| 3                | f <sub>c</sub> : Carbon factor                                                                                                                                                                                                                                                                                                             |      |                  |                   |                  |                   |                  |                   |                  |                   |                  |
|                  | $fc = (C_{CO2d} - C_{CO2ad}) \times 0.5441 + \frac{C_{COd}}{18522} + \frac{C_{HC\omega}}{17355}$                                                                                                                                                                                                                                           | 1    |                  |                   |                  |                   |                  |                   |                  |                   |                  |
|                  | C <sub>CO2 d</sub> : CO <sub>2</sub> concentration in exhaust gas, dry                                                                                                                                                                                                                                                                     | %    |                  |                   |                  |                   |                  |                   |                  |                   |                  |
|                  | C <sub>CO2 ad</sub> : CO <sub>2</sub> concentration in the atmosphere, dry                                                                                                                                                                                                                                                                 | %    |                  |                   |                  |                   |                  |                   |                  |                   |                  |
|                  | C <sub>CO d</sub> : CO concentration in exhaust gas, dry                                                                                                                                                                                                                                                                                   | ppm  |                  |                   |                  |                   |                  |                   |                  |                   |                  |
|                  | C <sub>HCω d</sub> : HC concentration in exhaust gas, wet                                                                                                                                                                                                                                                                                  | ppm  |                  |                   |                  |                   |                  |                   |                  |                   |                  |
| 4                | $f_{fd} = -0.055593 \times \omega_{ALF} + 0.0080021 \times \omega_{DEL} + 0.0070046 \times \omega_{EPS}$                                                                                                                                                                                                                                   | 1    |                  |                   |                  |                   |                  |                   |                  |                   |                  |
|                  | f <sub>fd</sub> : Fuel-specific factor for exhaust flow calculation on dry-basis                                                                                                                                                                                                                                                           | 1    |                  |                   |                  |                   |                  |                   |                  |                   |                  |
| 5                | k <sub>wr2</sub> : Dry to wet correction factor for the raw exhaust gas                                                                                                                                                                                                                                                                    |      |                  |                   |                  |                   |                  |                   |                  |                   |                  |
|                  | $k_{wr2} = \frac{1}{1 + \alpha \times 0.005 \times [C_{CO2d} + C_{COd}] - 0.01 \times C_{H2d} + k_{W2} \cdot \frac{pr}{pb}}$                                                                                                                                                                                                               | 1    |                  |                   |                  |                   |                  |                   |                  |                   |                  |
|                  | $\alpha = 11.9164 \times \frac{\omega_{ALF}}{\omega_{BET}}$                                                                                                                                                                                                                                                                                | 1    |                  |                   |                  |                   |                  |                   |                  |                   |                  |

|                                                            |                                                                                                                                                                                                                                                                                                                                                                                                                                                                                                           |                   |                                        |                 |          |                 |                 |                |                  |                   |       |       |   |        |        |  |                   |                                        |  |  |  |  |          |        |          |          |          |          |          |  |
|------------------------------------------------------------|-----------------------------------------------------------------------------------------------------------------------------------------------------------------------------------------------------------------------------------------------------------------------------------------------------------------------------------------------------------------------------------------------------------------------------------------------------------------------------------------------------------|-------------------|----------------------------------------|-----------------|----------|-----------------|-----------------|----------------|------------------|-------------------|-------|-------|---|--------|--------|--|-------------------|----------------------------------------|--|--|--|--|----------|--------|----------|----------|----------|----------|----------|--|
|                                                            | $C_{H2d}=\frac{0.5\times\alpha\times C_{COd}\times(C_{CO2d}+C_{COd})}{C_{COd}+3\times C_{CO2d}}$                                                                                                                                                                                                                                                                                                                                                                                                          | 1                 |                                        |                 |          |                 |                 |                |                  |                   |       |       |   |        |        |  |                   |                                        |  |  |  |  |          |        |          |          |          |          |          |  |
|                                                            | $k_{w2}=\frac{1.608\times Ha}{1000+1.608\times Ha}$                                                                                                                                                                                                                                                                                                                                                                                                                                                       | 1                 |                                        |                 |          |                 |                 |                |                  |                   |       |       |   |        |        |  |                   |                                        |  |  |  |  |          |        |          |          |          |          |          |  |
| 6                                                          | KH: Humidity correction factor for NO <sub>x</sub>                                                                                                                                                                                                                                                                                                                                                                                                                                                        |                   |                                        |                 |          |                 |                 |                |                  |                   |       |       |   |        |        |  |                   |                                        |  |  |  |  |          |        |          |          |          |          |          |  |
|                                                            | $KH=\frac{1}{1+A\times(Ha-10.71)+B\times(Ta-298)}$                                                                                                                                                                                                                                                                                                                                                                                                                                                        | 1                 |                                        |                 |          |                 |                 |                |                  |                   |       |       |   |        |        |  |                   |                                        |  |  |  |  |          |        |          |          |          |          |          |  |
|                                                            | A: $A=0.309\times\frac{q_{mf}}{q_{mad}}-0.0266$                                                                                                                                                                                                                                                                                                                                                                                                                                                           | 1                 |                                        |                 |          |                 |                 |                |                  |                   |       |       |   |        |        |  |                   |                                        |  |  |  |  |          |        |          |          |          |          |          |  |
|                                                            | B: $B=-0.209\times\frac{q_{mf}}{q_{mad}}+0.00954$                                                                                                                                                                                                                                                                                                                                                                                                                                                         | 1                 |                                        |                 |          |                 |                 |                |                  |                   |       |       |   |        |        |  |                   |                                        |  |  |  |  |          |        |          |          |          |          |          |  |
|                                                            | q <sub>mf</sub> : Fuel mass flow rate                                                                                                                                                                                                                                                                                                                                                                                                                                                                     | kg/h              |                                        |                 |          |                 |                 |                |                  |                   |       |       |   |        |        |  |                   |                                        |  |  |  |  |          |        |          |          |          |          |          |  |
|                                                            | q <sub>mad</sub> : Intake air mass flow rate on dry basis                                                                                                                                                                                                                                                                                                                                                                                                                                                 | kg/h              |                                        |                 |          |                 |                 |                |                  |                   |       |       |   |        |        |  |                   |                                        |  |  |  |  |          |        |          |          |          |          |          |  |
| 7                                                          | Emission mass flow rate of individual gas                                                                                                                                                                                                                                                                                                                                                                                                                                                                 |                   |                                        |                 |          |                 |                 |                |                  |                   |       |       |   |        |        |  |                   |                                        |  |  |  |  |          |        |          |          |          |          |          |  |
|                                                            | $q_{mgas}=u_{gas}\times c_{gas}\times q_{mew}\times KH$ (for NO <sub>x</sub> )                                                                                                                                                                                                                                                                                                                                                                                                                            | g/h               |                                        |                 |          |                 |                 |                |                  |                   |       |       |   |        |        |  |                   |                                        |  |  |  |  |          |        |          |          |          |          |          |  |
|                                                            | $q_{mgas}=u_{gas}\times c_{gas}\times q_{mew}$ (for other gases)                                                                                                                                                                                                                                                                                                                                                                                                                                          | g/h               |                                        |                 |          |                 |                 |                |                  |                   |       |       |   |        |        |  |                   |                                        |  |  |  |  |          |        |          |          |          |          |          |  |
|                                                            | c <sub>gas</sub> : concentration of the respective component in the raw exhaust gas, wet<br>c <sub>w</sub> =k <sub>wr2</sub> ×C <sub>d</sub>                                                                                                                                                                                                                                                                                                                                                              | ppm               |                                        |                 |          |                 |                 |                |                  |                   |       |       |   |        |        |  |                   |                                        |  |  |  |  |          |        |          |          |          |          |          |  |
|                                                            | Coefficient <i>u<sub>gas</sub></i> and fuel-specific parameters for raw exhaust gas                                                                                                                                                                                                                                                                                                                                                                                                                       |                   |                                        |                 |          |                 |                 |                |                  |                   |       |       |   |        |        |  |                   |                                        |  |  |  |  |          |        |          |          |          |          |          |  |
|                                                            | <table><tr><td>Gas</td><td></td><td>NO<sub>x</sub></td><td>CO</td><td>HC</td><td>CO<sub>2</sub></td><td>O<sub>2</sub></td></tr><tr><td>ρ<sub>gas</sub></td><td>kg/m<sup>3</sup></td><td>2.053</td><td>1.250</td><td>*</td><td>1.9636</td><td>1.4277</td></tr><tr><td></td><td>ρ<sub>e</sub> **</td><td colspan="5">Coefficient <i>u<sub>gas</sub></i> ***</td></tr><tr><td>Fuel oil</td><td>1.2943</td><td>0.001586</td><td>0.000966</td><td>0.000479</td><td>0.001517</td><td>0.001103</td></tr></table> | Gas               |                                        | NO <sub>x</sub> | CO       | HC              | CO <sub>2</sub> | O <sub>2</sub> | ρ <sub>gas</sub> | kg/m <sup>3</sup> | 2.053 | 1.250 | * | 1.9636 | 1.4277 |  | ρ <sub>e</sub> ** | Coefficient <i>u<sub>gas</sub></i> *** |  |  |  |  | Fuel oil | 1.2943 | 0.001586 | 0.000966 | 0.000479 | 0.001517 | 0.001103 |  |
|                                                            | Gas                                                                                                                                                                                                                                                                                                                                                                                                                                                                                                       |                   | NO <sub>x</sub>                        | CO              | HC       | CO <sub>2</sub> | O <sub>2</sub>  |                |                  |                   |       |       |   |        |        |  |                   |                                        |  |  |  |  |          |        |          |          |          |          |          |  |
|                                                            | ρ <sub>gas</sub>                                                                                                                                                                                                                                                                                                                                                                                                                                                                                          | kg/m <sup>3</sup> | 2.053                                  | 1.250           | *        | 1.9636          | 1.4277          |                |                  |                   |       |       |   |        |        |  |                   |                                        |  |  |  |  |          |        |          |          |          |          |          |  |
|                                                            |                                                                                                                                                                                                                                                                                                                                                                                                                                                                                                           | ρ <sub>e</sub> ** | Coefficient <i>u<sub>gas</sub></i> *** |                 |          |                 |                 |                |                  |                   |       |       |   |        |        |  |                   |                                        |  |  |  |  |          |        |          |          |          |          |          |  |
|                                                            | Fuel oil                                                                                                                                                                                                                                                                                                                                                                                                                                                                                                  | 1.2943            | 0.001586                               | 0.000966        | 0.000479 | 0.001517        | 0.001103        |                |                  |                   |       |       |   |        |        |  |                   |                                        |  |  |  |  |          |        |          |          |          |          |          |  |
| * depending on fuel                                        |                                                                                                                                                                                                                                                                                                                                                                                                                                                                                                           |                   |                                        |                 |          |                 |                 |                |                  |                   |       |       |   |        |        |  |                   |                                        |  |  |  |  |          |        |          |          |          |          |          |  |
| ** ρ <sub>e</sub> is the normal density of the exhaust gas |                                                                                                                                                                                                                                                                                                                                                                                                                                                                                                           |                   |                                        |                 |          |                 |                 |                |                  |                   |       |       |   |        |        |  |                   |                                        |  |  |  |  |          |        |          |          |          |          |          |  |
| *** at λ=2, wet air, 273K, 101.3 kPa                       |                                                                                                                                                                                                                                                                                                                                                                                                                                                                                                           |                   |                                        |                 |          |                 |                 |                |                  |                   |       |       |   |        |        |  |                   |                                        |  |  |  |  |          |        |          |          |          |          |          |  |
| λ: Excess air factor, kg dry air/(kg fuel • A/Fst)         |                                                                                                                                                                                                                                                                                                                                                                                                                                                                                                           |                   |                                        |                 |          |                 |                 |                |                  |                   |       |       |   |        |        |  |                   |                                        |  |  |  |  |          |        |          |          |          |          |          |  |
| A/Fst: Stoichiometric air to fuel ratio                    |                                                                                                                                                                                                                                                                                                                                                                                                                                                                                                           |                   |                                        |                 |          |                 |                 |                |                  |                   |       |       |   |        |        |  |                   |                                        |  |  |  |  |          |        |          |          |          |          |          |  |
| 8                                                          | $EF_{gas}^e=\frac{\sum_{i=1}^n q_{mags,i}\bullet W_{F,i}}{\sum_{i=1}^n P_i\bullet W_{F,i}}\bullet 10^3$<br>q <sub>mgas</sub> : the mass flow of individual gas<br><i>P<sub>i</sub></i> : the measured power of the individual mode<br>W <sub>F</sub> : weighting factor                                                                                                                                                                                                                                   | g/kW•h            |                                        |                 |          |                 |                 |                |                  |                   |       |       |   |        |        |  |                   |                                        |  |  |  |  |          |        |          |          |          |          |          |  |
| 9                                                          | $f_a=(\frac{99}{p_s})^{0.7}\times(\frac{T_a}{298})^{1.5}$<br>p <sub>s</sub> =p <sub>b</sub> -R <sub>a</sub> ×p <sub>a</sub> /100<br>Ta: Intake air temperature, K;<br>Ra: Relative humidity of the intake air,%;<br>Pb: Atmospheric pressure, kPa;<br>Pa: Saturation vapour pressure of the engine intake air determined using a temperature value for the intake air measured at the same physical location as the measurements for pb and Ra, kPa.                                                      | 1                 |                                        |                 |          |                 |                 |                |                  |                   |       |       |   |        |        |  |                   |                                        |  |  |  |  |          |        |          |          |          |          |          |  |

**Table S7.** Marine diesel engine parameters under CHINA I emission standard (E3-cycle).

| No. | Number of cylinders | Cylinder bore (mm) | Rated power(kW) | Rated speed (r/min) | Single-cylinder displacement (L) | V-type/<br>L-type |
|-----|---------------------|--------------------|-----------------|---------------------|----------------------------------|-------------------|
| 1   | 6                   | 105                | 168             | 2230                | 1.1                              | L                 |
| 2   | 4                   | 105                | 56              | 1500                | 1.1                              | L                 |
| 3   | 6                   | 105                | 168             | 2230                | 1.1                              | L                 |
| 4   | 6                   | 105                | 168             | 2230                | 1.1                              | L                 |
| 5   | 12                  | 170                | 1103            | 1500                | 4.5                              | V                 |
| 6   | 6                   | 160                | 300             | 1000                | 4.5                              | L                 |
| 7   | 6                   | 160                | 441             | 1500                | 4.0                              | L                 |
| 8   | 6                   | 127                | 354             | 1800                | 2.1                              | L                 |
| 9   | 6                   | 126                | 240             | 1500                | 1.9                              | L                 |
| 10  | 6                   | 126                | 256             | 1800                | 1.6                              | L                 |
| 11  | 6                   | 108                | 197             | 1800                | 1.3                              | L                 |
| 12  | 6                   | 127                | 368             | 1800                | 2.1                              | L                 |
| 13  | 6                   | 126                | 205             | 1500                | 1.6                              | L                 |
| 14  | 6                   | 150                | 478             | 1500                | 3.3                              | L                 |
| 15  | 6                   | 150                | 368             | 1500                | 2.7                              | L                 |
| 16  | 6                   | 170                | 601             | 1500                | 4.5                              | L                 |
| 17  | 6                   | 170                | 601             | 1500                | 4.5                              | L                 |
| 18  | 6                   | 160                | 556             | 1500                | 4.3                              | L                 |
| 19  | 6                   | 190                | 750             | 1200                | 6.4                              | L                 |
| 20  | 6                   | 180                | 600             | 1500                | 5.3                              | L                 |
| 21  | 6                   | 210                | 920             | 1000                | 10.0                             | L                 |
| 22  | 6                   | 200                | 1103            | 1000                | 9.0                              | L                 |
| 23  | 6                   | 250                | 1400            | 1000                | 14.7                             | L                 |
| 24  | 6                   | 150                | 1470            | 1000                | 14.7                             | L                 |
| 25  | 6                   | 200                | 1320            | 1000                | 9.4                              | L                 |
| 26  | 6                   | 180                | 440             | 1000                | 5.3                              | L                 |
| 27  | 8                   | 200                | 1325            | 1200                | 8.6                              | L                 |
| 28  | 6                   | 250                | 1470            | 1000                | 14.7                             | L                 |
| 29  | 6                   | 200                | 810             | 1000                | 8.5                              | L                 |
| 30  | 6                   | 200                | 1200            | 1000                | 9.4                              | L                 |
| 31  | 6                   | 250                | 1470            | 850                 | 15.7                             | L                 |
| 32  | 6                   | 270                | 2190            | 800                 | 22.0                             | L                 |
| 33  | 8                   | 270                | 2720            | 800                 | 21.8                             | L                 |
| 34  | 6                   | 280                | 2400            | 800                 | 25.3                             | L                 |

**Table S8.** Marine diesel engine parameters under CHINA I emission standard (E2-cycle).

| No. | Number of cylinders | Cylinder bore (mm) | Rated power(kW) | Rated speed (r/min) | Single-cylinder displacement (L) | V-type/<br>L-type |
|-----|---------------------|--------------------|-----------------|---------------------|----------------------------------|-------------------|
| 1   | 12                  | 170                | 1103            | 1500                | 4.5                              | V                 |

|    |   |     |      |      |      |   |
|----|---|-----|------|------|------|---|
| 2  | 6 | 230 | 1213 | 1000 | 11.5 | L |
| 3  | 6 | 200 | 1200 | 1000 | 9.4  | L |
| 4  | 6 | 180 | 600  | 1500 | 5.3  | L |
| 5  | 6 | 210 | 920  | 1000 | 10.0 | L |
| 6  | 6 | 200 | 1103 | 1000 | 9.0  | L |
| 7  | 6 | 250 | 1470 | 1000 | 14.7 | L |
| 8  | 6 | 200 | 810  | 1000 | 8.5  | L |
| 9  | 6 | 200 | 1320 | 1000 | 9.4  | L |
| 10 | 6 | 250 | 1470 | 1000 | 14.7 | L |
| 11 | 6 | 250 | 1324 | 825  | 15.7 | L |
| 12 | 6 | 230 | 1765 | 850  | 17.5 | L |
| 13 | 6 | 250 | 1470 | 850  | 15.7 | L |
| 14 | 6 | 270 | 2190 | 800  | 22.0 | L |
| 15 | 8 | 270 | 2640 | 750  | 21.8 | L |
| 16 | 6 | 280 | 2400 | 800  | 25.3 | L |

**Table S9.** Marine diesel engine parameters under CHINA I emission standard (D2-cycle).

| No. | Number of cylinders | Cylinder bore (mm) | Rated power(kW) | Rated speed (r/min) | Single-cylinder displacement (L) | V-type/<br>L-type |
|-----|---------------------|--------------------|-----------------|---------------------|----------------------------------|-------------------|
| 1   | 4                   | 105                | 56              | 1500                | 1.1                              | L                 |
| 2   | 6                   | 105                | 240             | 1500                | 1.1                              | L                 |
| 3   | 6                   | 105                | 138             | 1500                | 1.1                              | L                 |
| 4   | 6                   | 105                | 138             | 1500                | 1.1                              | L                 |
| 5   | 6                   | 127                | 287             | 1500                | 2.1                              | L                 |
| 6   | 6                   | 126                | 288             | 1500                | 1.9                              | L                 |
| 7   | 12                  | 170                | 1103            | 1500                | 4.5                              | V                 |
| 8   | 6                   | 127                | 350             | 1500                | 2.1                              | L                 |
| 9   | 6                   | 170                | 601             | 1500                | 4.5                              | L                 |
| 10  | 6                   | 150                | 500             | 1500                | 3.3                              | L                 |
| 11  | 6                   | 150                | 440             | 1500                | 2.7                              | L                 |
| 12  | 6                   | 160                | 441             | 1500                | 4.0                              | L                 |
| 13  | 6                   | 250                | 1470            | 1000                | 14.7                             | L                 |
| 14  | 6                   | 200                | 810             | 1000                | 8.5                              | L                 |
| 15  | 6                   | 250                | 1470            | 1000                | 14.7                             | L                 |
| 16  | 6                   | 200                | 1320            | 1000                | 9.4                              | L                 |
| 17  | 8                   | 200                | 1325            | 1200                | 8.6                              | L                 |
| 18  | 6                   | 230                | 1213            | 1000                | 11.5                             | L                 |
| 19  | 6                   | 200                | 1200            | 1000                | 9.4                              | L                 |
| 20  | 6                   | 180                | 600             | 1500                | 6.3                              | L                 |
| 21  | 6                   | 210                | 920             | 1000                | 10.0                             | L                 |
| 22  | 6                   | 200                | 1103            | 1000                | 9.0                              | L                 |
| 23  | 6                   | 260                | 1610            | 750                 | 17.5                             | L                 |
| 24  | 6                   | 250                | 1213            | 750                 | 15.7                             | L                 |

|    |   |     |      |     |      |   |
|----|---|-----|------|-----|------|---|
| 25 | 6 | 270 | 1800 | 750 | 22.0 | L |
| 26 | 6 | 280 | 2250 | 750 | 25.3 | L |

**Table S10.** Marine diesel engine parameters under CHINA II emission standard (E3-cycle).

| No. | Number of cylinders | Cylinder bore (mm) | Rated power(kW) | Rated speed (r/min) | Single-cylinder displacement (L) | V-type/<br>L-type |
|-----|---------------------|--------------------|-----------------|---------------------|----------------------------------|-------------------|
| 1   | 4                   | 94                 | 118             | 3000                | 0.7                              | L                 |
| 2   | 4                   | 89                 | 75              | 2100                | 0.6                              | L                 |
| 3   | 6                   | 127                | 735             | 2300                | 2.1                              | L                 |
| 4   | 6                   | 108                | 197             | 1800                | 1.3                              | L                 |
| 5   | 6                   | 127                | 405             | 1800                | 2.1                              | L                 |
| 6   | 6                   | 170                | 601             | 1500                | 4.5                              | L                 |
| 7   | 6                   | 170                | 601             | 1500                | 4.5                              | L                 |
| 8   | 12                  | 170                | 1620            | 1500                | 4.5                              | V                 |
| 9   | 6                   | 140                | 390             | 1800                | 2.2                              | L                 |
| 10  | 6                   | 180                | 440             | 1000                | 5.3                              | L                 |
| 11  | 12                  | 180                | 2536            | 1800                | 5.5                              | V                 |
| 12  | 6                   | 170                | 810             | 1500                | 5.0                              | L                 |
| 13  | 6                   | 200                | 810             | 1350                | 6.6                              | L                 |
| 14  | 8                   | 200                | 1765            | 1000                | 9.4                              | L                 |
| 15  | 6                   | 200                | 810             | 1000                | 8.5                              | L                 |
| 16  | 6                   | 200                | 1000            | 1200                | 8.6                              | L                 |
| 17  | 16                  | 200                | 2400            | 1100                | 8.5                              | V                 |
| 18  | 6                   | 250                | 1800            | 1000                | 16.2                             | L                 |
| 19  | 8                   | 250                | 2680            | 1000                | 16.2                             | L                 |
| 20  | 8                   | 250                | 1912            | 1000                | 16.2                             | L                 |
| 21  | 6                   | 260                | 1765            | 850                 | 17.5                             | L                 |
| 22  | 6                   | 250                | 1324            | 825                 | 15.7                             | L                 |
| 23  | 7                   | 270                | 2555            | 800                 | 21.8                             | L                 |
| 24  | 6                   | 280                | 2647            | 800                 | 25.3                             | L                 |
| 25  | 6                   | 280                | 2400            | 800                 | 25.3                             | L                 |
| 26  | 6                   | 280                | 2700            | 800                 | 25.3                             | L                 |
| 27  | 6                   | 280                | 2647            | 800                 | 25.3                             | L                 |

**Table S11.** Marine diesel engine parameters under CHINA II emission standard (E2-cycle).

| No. | Number of cylinders | Cylinder bore (mm) | Rated power(kW) | Rated speed (r/min) | Single-cylinder displacement (L) | V-type/<br>L-type |
|-----|---------------------|--------------------|-----------------|---------------------|----------------------------------|-------------------|
| 1   | 12                  | 170                | 1620            | 1500                | 4.5                              | V                 |
| 2   | 12                  | 180                | 2200            | 1500                | 5.5                              | V                 |
| 3   | 6                   | 170                | 735             | 1500                | 5.0                              | L                 |
| 4   | 6                   | 180                | 440             | 1000                | 5.3                              | L                 |



|    |   |     |      |      |      |   |
|----|---|-----|------|------|------|---|
| 5  | 8 | 200 | 1700 | 1000 | 9.4  | L |
| 6  | 6 | 200 | 810  | 1000 | 8.5  | L |
| 7  | 6 | 250 | 1800 | 1000 | 16.2 | L |
| 8  | 8 | 250 | 2600 | 1000 | 16.2 | L |
| 9  | 8 | 250 | 1912 | 1000 | 16.2 | L |
| 10 | 6 | 260 | 1765 | 850  | 17.5 | L |
| 11 | 6 | 280 | 2647 | 800  | 25.3 | L |
| 12 | 8 | 280 | 2400 | 800  | 25.3 | L |
| 13 | 6 | 280 | 2700 | 800  | 25.3 | L |
| 14 | 6 | 280 | 2647 | 800  | 25.3 | L |

**Table S12.** Marine diesel engine parameters under CHINA II emission standard (D2-cycle).

| No. | Number of cylinders | Cylinder bore (mm) | Rated power(kW) | Rated speed (r/min) | Single-cylinder displacement (L) | V-type/<br>L-type |
|-----|---------------------|--------------------|-----------------|---------------------|----------------------------------|-------------------|
| 1   | 4                   | 89                 | 60              | 1500                | 0.6                              | L                 |
| 2   | 6                   | 150                | 575             | 1500                | 3.3                              | L                 |
| 3   | 6                   | 127                | 350             | 1500                | 2.1                              | L                 |
| 4   | 6                   | 170                | 440             | 1000                | 4.5                              | L                 |
| 5   | 12                  | 170                | 1620            | 1500                | 4.5                              | V                 |
| 6   | 12                  | 180                | 2200            | 1500                | 5.5                              | V                 |
| 7   | 6                   | 170                | 735             | 1500                | 5.0                              | L                 |
| 8   | 6                   | 180                | 440             | 1000                | 5.3                              | L                 |
| 9   | 8                   | 200                | 1700            | 1000                | 9.4                              | L                 |
| 10  | 6                   | 200                | 810             | 1000                | 9.4                              | L                 |
| 11  | 6                   | 200                | 1000            | 1200                | 8.6                              | L                 |
| 12  | 6                   | 250                | 1800            | 1000                | 16.2                             | L                 |
| 13  | 8                   | 250                | 2600            | 1000                | 16.2                             | L                 |
| 14  | 8                   | 250                | 1912            | 1000                | 16.2                             | L                 |
| 15  | 6                   | 250                | 1213            | 750                 | 15.7                             | L                 |
| 16  | 6                   | 260                | 1610            | 750                 | 17.5                             | L                 |
| 17  | 6                   | 280                | 2365            | 750                 | 25.3                             | L                 |
| 18  | 6                   | 280                | 2365            | 750                 | 25.3                             | L                 |
